# Supplementary material for: Community Structure and Abundance of Archaea in a Zostera marina Meadow: A Comparison between Seagrass-Colonized and Bare Sediment Sites
Source: Hindawi journal article supplement (doi:10.1155/2019/5108012), 2019-11-18
Supplement: f1 [file 5108012.f1.pdf]

Supplementary Material for

**Community structure and abundance of archaea in a *Zostera marina* meadow: A comparison between seagrass-colonized and bare sediment sites**

Pengfei Zheng<sup>1,2</sup>, Chuantao Wang<sup>3</sup>, Xiaoli Zhang<sup>1\*</sup>, Jun Gong<sup>1,4,5\*</sup>

<sup>1</sup>CAS Key Laboratory of Coastal Environmental Processes and Ecological Remediation, Yantai Institute of Coastal Zone Research, Chinese Academy of Sciences, Yantai 264003, China.

<sup>2</sup>University of Chinese Academy of Sciences, Beijing 100049, China.

<sup>3</sup>Shandong Oriental Ocean Sci-tech Co., Ltd, Yantai 264003, China.

<sup>4</sup>Laboratory of Microbial Ecology and Matter Cycles, School of Marine Sciences, Sun Yat-Sen University, Zhuhai 519082, China.

<sup>5</sup>Southern Marine Science and Engineering Guangdong Laboratory (Zhuhai), Zhuhai, China

**Corresponding author**

Xiaoli Zhang, Email: [xlzhang@yic.ac.cn](mailto:xlzhang@yic.ac.cn)

Jun Gong, Email: [gongj27@mail.sysu.edu.cn](mailto:gongj27@mail.sysu.edu.cn)

**Contents of this file**

Figures S1 and S2

Tables S1 and Tables S2

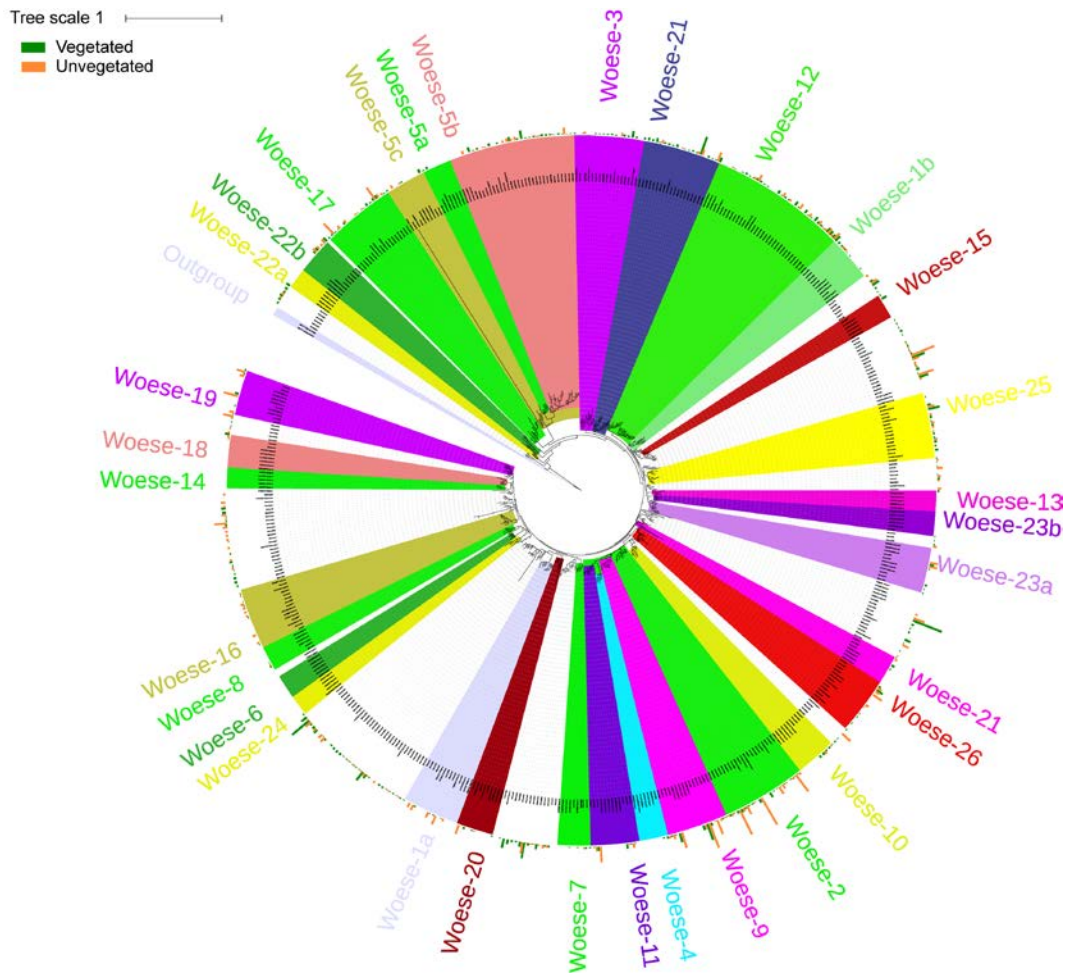

**Figure S1** The phylogenetic maximum-likelihood (ML) tree was constructed for all *Woesearchaeota* 16S rRNA gene sequences obtained in the study with bacterial 16S rRNA gene sequences as the outgroup. Sequences for typical *Woesearchaeota* subclades according to the nomenclature promoted by Liu et al. (2018) are used as major references for constructing the phylogenetic tree. The ML tree was built with the “FastTree” program and edited with the online tool iTOL (<http://itol.embl.de/>)

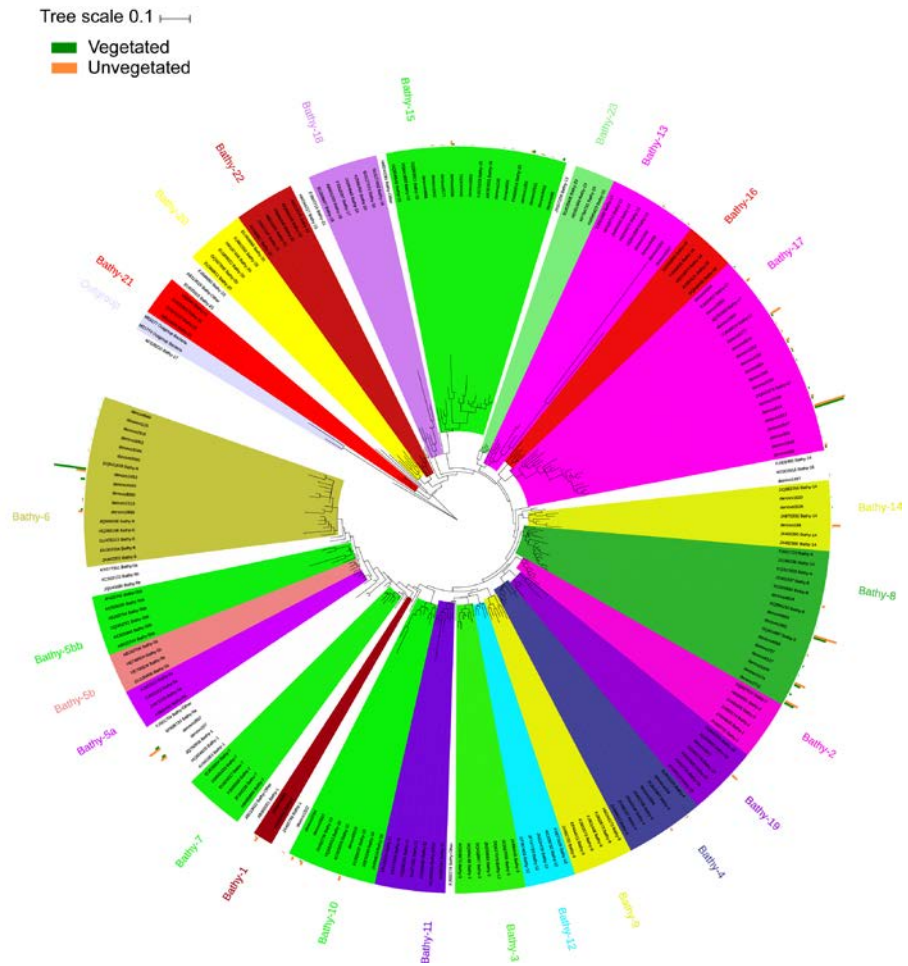

**Figure S2** The phylogenetic maximum-likelihood (ML) tree was built for all *Bathyarchaeota* 16S rRNA gene sequences obtained in this study with bacterial 16S rRNA gene sequences as the outgroup. Sequences for typical *Bathyarchaeota* subclades according to the nomenclature promoted by Zhou et al. (2018) are used as major references for constructing the phylogenetic tree. The ML tree was built with the “FastTree” program and edited with the online tool iTOL (<http://itol.embl.de/>)

**Table S1** Summary of archaeal sequence information and alpha diversity in all sediment samples

| Sample ID | Sequence information |              |                               |                                 | Alpha diversity |        |         |         |
|-----------|----------------------|--------------|-------------------------------|---------------------------------|-----------------|--------|---------|---------|
|           | Raw seqs             | Quality seqs | After discarding chimera seqs | After discarding singleton seqs | OTU Richness    | Chao1  | Shannon | Simpson |
| V1        | 28136                | 21783        | 14139                         | 6326                            | 141             | 296.88 | 6.39    | 0.98    |
| V2        | 22951                | 10501        | 9010                          | 8343                            | 167             | 353.84 | 6.96    | 0.99    |
| V3        | 14610                | 11770        | 6839                          | 6326                            | 152             | 343.40 | 6.62    | 0.98    |
| U1        | 13293                | 5402         | 4840                          | 4596                            | 137             | 198.72 | 6.74    | 0.99    |
| U2        | 7618                 | 3643         | 3386                          | 3285                            | 135             | 211.68 | 6.52    | 0.98    |
| U3        | 14028                | 5843         | 5305                          | 5046                            | 156             | 311.70 | 6.82    | 0.99    |

**Table S2** Comparison of the relative proportions and 16S rRNA gene copy numbers of archaeal lineages based on SILVA (v. 128) between the vegetated and unvegetated sediments. The pairwise differences were examined using *t*-tests (n=3)<sup>a</sup>

| Taxonomy              | % Relative proportion |            |              | Copy numbers (mean ± SE)                           |            |              |
|-----------------------|-----------------------|------------|--------------|----------------------------------------------------|------------|--------------|
|                       | (mean ± SE)           |            |              | (x10 <sup>6</sup> copies g <sup>-1</sup> sediment) |            |              |
|                       | Unvegetated           | Vegetated  | <i>P</i>     | Unvegetated                                        | Vegetated  | <i>P</i>     |
| <i>Woesearchaeota</i> | 45.45±0.98            | 39.34±7.72 | 0.556        | 5.31±1.13                                          | 11.98±2.75 | 0.141        |
| Woese-10              | 0.15±0.12             | 0.55±0.07  | 0.076        | 0.01±0.01                                          | 0.16±0.03  | <b>0.014</b> |
| Woese-11              | 2.34±0.81             | 3.53±1.43  | 0.586        | 0.22±0.07                                          | 1.08±0.42  | 0.173        |
| Woese-12              | 2.03±0.57             | 3.19±0.58  | 0.311        | 0.27±0.12                                          | 1.01±0.31  | 0.139        |
| Woese-13              | 0.41±0.17             | 1.26±0.32  | 0.130        | 0.04±0.02                                          | 0.36±0.07  | <b>0.027</b> |
| Woese-14              | 0.36±0.04             | 0.99±0.52  | 0.385        | 0.04±0.01                                          | 0.35±0.21  | 0.305        |
| Woese-15              | 0±0                   | 0.35±0.24  | 0.297        | 0±0                                                | 0.13±0.09  | 0.315        |
| Woese-16              | 0.95±0.1              | 0.28±0.23  | 0.092        | 0.10±0.01                                          | 0.08±0.07  | 0.796        |
| Woese-17              | 1.35±0.21             | 0.58±0.18  | 0.090        | 0.16±0.04                                          | 0.15±0.04  | 0.877        |
| Woese-19              | 2.15±0.6              | 0.67±0.37  | 0.160        | 0.24±0.07                                          | 0.21±0.11  | 0.834        |
| Woese-1a              | 1.59±0.32             | 0.59±0.15  | 0.082        | 0.2±0.07                                           | 0.18±0.05  | 0.808        |
| Woese-1b              | 0.58±0.26             | 0.35±0.13  | 0.551        | 0.08±0.04                                          | 0.10±0.03  | 0.877        |
| Woese-2               | 9.24±1.87             | 4.35±1.27  | 0.153        | 0.96±0.05                                          | 1.31±0.39  | 0.499        |
| Woese-20              | 2.26±0.14             | 0.80±0.30  | <b>0.023</b> | 0.27±0.07                                          | 0.25±0.09  | 0.912        |
| Woese-21              | 0±0                   | 0.26±0.03  | <b>0.003</b> | 0±0                                                | 0.07±0     | <b>0</b>     |
| Woese-22a             | 0±0                   | 0.04±0.03  | 0.374        | 0±0                                                | 0.01±0.01  | 0.374        |
| Woese-23a             | 0±0                   | 0.09±0.07  | 0.374        | 0±0                                                | 0.03±0.03  | 0.374        |
| Woese-24              | 0±0                   | 0.09±0.07  | 0.374        | 0±0                                                | 0.03±0.03  | 0.374        |
| Woese-25              | 0.90±0.080            | 1.05±0.14  | 0.510        | 0.11±0.03                                          | 0.33±0.09  | 0.125        |
| Woese-26              | 0.75±0.30             | 0.40±0.14  | 0.435        | 0.10±0.06                                          | 0.13±0.06  | 0.798        |
| Woese-3               | 0.11±0.09             | 0.55±0.03  | <b>0.018</b> | 0.01±0.01                                          | 0.17±0.03  | <b>0.011</b> |

|                                         |            |            |              |           |           |              |
|-----------------------------------------|------------|------------|--------------|-----------|-----------|--------------|
| Woese-4                                 | 0.07±0.06  | 0.13±0.11  | 0.709        | 0.01±0.01 | 0.05±0.04 | 0.445        |
| Woese-5a                                | 0.12±0.1   | 0.31±0.26  | 0.599        | 0.02±0.02 | 0.07±0.06 | 0.537        |
| Woese-5b                                | 2.11±1.39  | 2.23±0.46  | 0.951        | 0.34±0.24 | 0.67±0.15 | 0.395        |
| Woese-7                                 | 0.18±0.15  | 0.30±0.07  | 0.599        | 0.02±0.02 | 0.10±0.03 | 0.167        |
| Woese-8                                 | 1.60±0.06  | 1.48±0.63  | 0.889        | 0.18±0.03 | 0.45±0.18 | 0.301        |
| Woese-9                                 | 5.36±0.32  | 3.63±1.70  | 0.460        | 0.63±0.15 | 1.11±0.49 | 0.482        |
| Woese-Other                             | 10.84±0.51 | 11.31±1.83 | 0.851        | 1.29±0.30 | 3.40±0.66 | 0.077        |
| <i>Bathymarchaeota</i>                  | 15.44±3.87 | 26.17±5.40 | 0.258        | 1.61±0.33 | 7.43±1.13 | <b>0.016</b> |
| Bathy-1                                 | 1.01±0.28  | 1.25±0.23  | 0.609        | 0.1±0.02  | 0.39±0.12 | 0.125        |
| Bathy-10                                | 0.44±0.36  | 0.04±0.03  | 0.417        | 0.04±0.04 | 0.01±0.01 | 0.477        |
| Bathy-13                                | 0.07±0.06  | 0.06±0.03  | 0.908        | 0.01±0.01 | 0.02±0.01 | 0.430        |
| Bathy-14                                | 1.67±0.70  | 1.16±0.43  | 0.635        | 0.22±0.09 | 0.39±0.19 | 0.552        |
| Bathy-15                                | 0.75±0.34  | 1.77±0.34  | 0.160        | 0.07±0.03 | 0.49±0.04 | <b>0.002</b> |
| Bathy-17                                | 4.63±1.69  | 7.10±2.66  | 0.557        | 0.46±0.16 | 1.93±0.55 | 0.103        |
| Bathy-18                                | 0±0        | 0.13±0.03  | <b>0.035</b> | 0±0       | 0.04±0.01 | <b>0.005</b> |
| Bathy-19                                | 0.36±0.30  | 0±0        | 0.374        | 0.04±0.03 | 0±0       | 0.374        |
| Bathy-23                                | 0.19±0.15  | 0±0        | 0.374        | 0.01±0.01 | 0±0       | 0.374        |
| Bathy-4                                 | 0.15±0.12  | 0±0        | 0.374        | 0.01±0.01 | 0±0       | 0.374        |
| Bathy-6                                 | 1.80±0.47  | 8.15±1.16  | <b>0.014</b> | 0.21±0.07 | 2.41±0.45 | <b>0.017</b> |
| Bathy-8                                 | 4.30±1.16  | 6.48±1.63  | 0.423        | 0.42±0.08 | 1.75±0.22 | <b>0.010</b> |
| Bathy-Other                             | 0.07±0.06  | 0.02±0.02  | 0.525        | 0.01±0.01 | 0±0       | 0.751        |
| <i>Thaumarchaeota</i>                   | 21.46±1.35 | 12.6±1.23  | <b>0.017</b> | 2.51±0.56 | 3.89±0.88 | 0.338        |
| Group C3                                | 6.59±0.62  | 8.67±0.77  | 0.16         | 0.74±0.11 | 2.61±0.48 | <b>0.036</b> |
| Marine Benthic Group A                  | 0±0        | 0.02±0.02  | 0.374        | 0±0       | 0±0       | 0.374        |
| Marine Group I                          | 8.04±2.16  | 0.99±0.40  | 0.059        | 0.80±0.08 | 0.33±0.14 | 0.072        |
| Soil Crenarchaeotic Group (SCG)         | 6.84±2.73  | 2.80±0.75  | 0.309        | 0.97±0.54 | 0.92±0.32 | 0.951        |
| South African Gold Mine Gp 1 (SAGMCG-1) | 0±0        | 0.04±0.04  | 0.374        | 0±0       | 0.02±0.01 | 0.374        |
| <i>Euryarchaeota</i>                    | 10.81±2.29 | 13.32±1.33 | 0.482        | 1.4±0.52  | 4.04±0.83 | 0.093        |
| <i>Halobacteria</i>                     | 0.37±0.15  | 0.08±0.02  | 0.192        | 0.05±0.03 | 0.02±0.01 | 0.491        |
| <i>Methanobacteria</i>                  | 3.57±1.67  | 1.42±0.28  | 0.358        | 0.52±0.32 | 0.45±0.14 | 0.878        |
| <i>Methanomicrobia</i>                  | 0.44±0.27  | 0.37±0.14  | 0.86         | 0.07±0.05 | 0.11±0.04 | 0.639        |
| <i>Thermoplasmata</i>                   | 6.42±1.32  | 11.45±1.42 | 0.101        | 0.75±0.18 | 3.45±0.73 | <b>0.043</b> |
| <i>Aenigmarchaeota</i>                  | 3.73±1.16  | 0.89±0.37  | 0.13         | 0.41±0.12 | 0.26±0.11 | 0.476        |
| Deep Sea Euryarchaeotic Group (DSEG)    | 3.73±1.16  | 0.89±0.37  | 0.13         | 0.41±0.12 | 0.26±0.11 | 0.476        |

|                                          |  |  |           |           |       |           |           |              |
|------------------------------------------|--|--|-----------|-----------|-------|-----------|-----------|--------------|
| <i>Lokiarchaeota</i>                     |  |  | 1.86±0.56 | 3.33±1.24 | 0.427 | 0.21±0.07 | 0.91±0.27 | 0.108        |
| Marine Hydrothermal Vent Group (MHVG)    |  |  | 0.44±0.19 | 1.64±0.31 | 0.055 | 0.04±0.02 | 0.47±0.06 | <b>0.006</b> |
| Miscellaneous Euryarchaeotic Group (MEG) |  |  | 0.26±0.13 | 0.68±0.22 | 0.255 | 0.02±0.01 | 0.18±0.04 | <b>0.03</b>  |
| <i>Altiarchaeales</i>                    |  |  | 0.16±0.09 | 0.04±0.04 | 0.387 | 0.02±0.02 | 0.02±0.01 | 0.791        |
| Ancient Archaeal Group (AAG)             |  |  | 0±0       | 1.19±0.51 | 0.132 | 0±0       | 0.38±0.19 | 0.188        |
| AK8                                      |  |  | 0.07±0.06 | 0.11±0.07 | 0.73  | 0.01±0.01 | 0.03±0.01 | 0.327        |
| <i>Diapherotrites</i>                    |  |  | 0.07±0.06 | 0.21±0.11 | 0.41  | 0.01±0.01 | 0.06±0.03 | 0.242        |
| WSA2                                     |  |  | 0.24±0.20 | 0.16±0.08 | 0.772 | 0.04±0.03 | 0.05±0.02 | 0.902        |
| 20a-9                                    |  |  | 0.24±0.20 | 0.16±0.08 | 0.772 | 0.04±0.03 | 0.05±0.02 | 0.902        |
| Unclassified Archaea                     |  |  | 0±0       | 0.33±0.13 | 0.117 | 0±0       | 0.1±0.04  | 0.135        |

<sup>a</sup> Significant differences ( $P < 0.05$ ) are highlighted in bold.
